# Supplementary material
Source: publisher figshare collection journal article supplement (https://karger.figshare.com/ndownloader/files/21434883)
Supplement: Supplementary file 1 [file 21434883]

**RELIABILITY OF HOME NOCTURNAL OXIMETRY IN THE DIAGNOSIS OF OVERLAP SYNDROME IN COPD**

**Supplementary file**

Annie-Christine Lajoie, Frédéric Sériès, Sarah Bernard, Emmanuelle Bernard,

Carlos Javier Egea Santaolalla, Araceli Abad Fernández, François Maltais, Yves Lacasse

**Table 1S: Baseline clinical characteristics in patients suspected of having OSA**

|  | PSG done  (n = 86) | PSG not done  (n = 80) | P value |
| --- | --- | --- | --- |
| Age, mean years (SD) | 68.6 (7.7) | 71.6 (9.0) | 0.02 |
| Gender, n male (% male) | 68 (79.1) | 54 (67.5) | 0.11 |
| Caucasian, n (%) | 85 (100) | 78 (97.5) 1 | 0.23 |
| Body mass index, kg/m2 (SD) | 28.8 (5.9) | 27.9 (5.9) | 0.30 |
| Pack-years (SD) | 59.9 (32.9) | 63.0 (39.4) | 0.58 |
| Left heart failure, n (%) | 6 (7.0) | 7 (8.6) | 0.78 |
| Cardiovascular disease, n (%) | 18 (20.9) | 12 (15.0) | 0.42 |
| Cerebrovascular disease, n (%) | 3 (3.5) | 5 (6.3) | 0.48 |
| Atrial fibrillation, n (%) | 4 (4.7) | 12 (15.0) | 0.03 |
| Arterial hypertension, n (%) | 45 (52.3) | 30 (37.5) | 0.06 |
| Dyspnea MRC, (SD) |  | 1 | 0.63 |
| - I | 2 (2.3) | 4 (5.0) | - |
| - II | 19 (22.1) | 15 (18.8) | - |
| - III | 36 (41.9) | 22 (41.3) | - |
| - IV | 22 (25.6) | 24 (30.0) | - |
| - V | 7 (8.1) | 3 (3.8) | - |
| Resting systolic blood pressure, mmHg (SD) | 131.1 (16.0) | 131.9 (18.7) | 0.77 |
| Resting diastolic blood pressure, mmHg (SD) | 75.1 (10.1) | 75.3 (13.0) | 0.92 |
| Medication, number of patients (%) | 2 |  |  |
| - Theophylline | 7 (8.1) | 10 (13.2) | 0.32 |
| - Diuretics | 26 (30.2) | 28 (36.8) | 0.41 |
| - Long-acting anticholinergics | 75 (87.2) | 63 (82.9) | 0.51 |
| - Long-acting beta-agonists | 82 (95.4) | 59 (77.6) | 0.0009 |
| - Oral steroids | 11 (12.9) | 4 (5.3) | 0.11 |
| - Benzodiazepine | 16 (18.6) | 14 (18.4) | 1.0 |
| - Opiates | 3 (3.5) | 2 (2.6) | 1.0 |

MRC: Medical Research Council dyspnea scale; PSG: polysomnography; SD: standard deviation.

1Missing = 1, 2 Missing = 4

**Table 2S: Pulmonary function tests results in patients with suspicion of OSA**

|  | PSG done  (n = 86) | PSG not done  (n = 80) | P value | |
| --- | --- | --- | --- | --- |
| FEV1 % predicted, mean (SD) | 47.4 (17.4) | 48.2 (16.1) | 0.76 |
| FVC % predicted, mean (SD) | 78.5 (22.2) | 80.0 (21.7) | 0.68 |
| FEV1 / FVC, mean (SD) | 0.50 (0.26) | 0.48 (0.15) | 0.99 |

FEV1: forced expiratory volume in one second; FVC: forced vital capacity; SD: standard deviation.

**Table 3S: Comparison of nocturnal home oximetry results in patients with suspicion of OSA.**

|  | PSG done  (n = 86) | PSG not done  (n=80) | P value |
| --- | --- | --- | --- |
| Recording time, mean minutes (SD) | 497.5 (131.0) | 483.8 (97.7) | 0.45 |
| Desaturation index, mean (SD) | 28.8 (13.3) | 30.5 (13.3) | 0.42 |
| Average saturation, mean % (SD) | 89.3 (1.9) | 89.1 (2.6) | 0.57 |
| % recording time with sat. < 90%, mean (SD) | 64.6 (21.9) | 65.1 (20.8) | 0.89 |
